# Supplementary material for: Non-invasive assessment of portal hypertension using quantitative magnetic resonance imaging
Source: PubMed Central journal article supplement — J Hepatol. 2016 Dec;65(6):1131–9. doi: 10.1016/j.jhep.2016.07.021 (PMC5123896; doi:10.1016/j.jhep.2016.07.021), 2016-12
Supplement: mmc1.pdf [file mmc1.pdf]

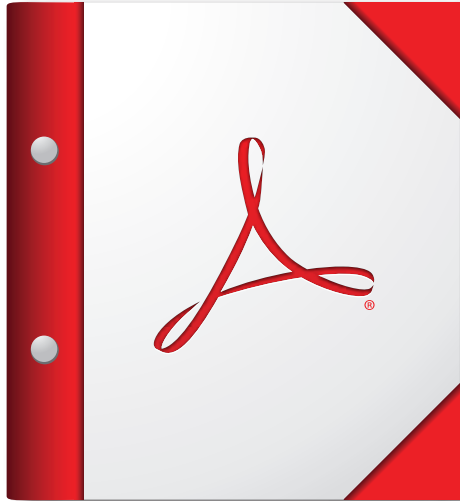

**For the best experience, open this PDF portfolio in  
Acrobat X or Adobe Reader X, or later.**

[Get Adobe Reader Now!](#)
